# Supplementary material for: Common Perceived Barriers and Facilitators for Reducing Sedentary Behaviour among Office Workers
Source: PubMed Central journal article supplement (PMC5923834; doi:10.3390/ijerph15040792), 2018-04-18
Supplement: ijerph-15-00792-s001.pdf [file ijerph-15-00792-s001.pdf]

Table S1. Barriers and facilitators to change work-related sedentary behaviour questionnaire in Swedish and English.

| Swedish                                                                                                                                                                                                                                             | English                                                                                                                                                                                                   | Answer options |
|-----------------------------------------------------------------------------------------------------------------------------------------------------------------------------------------------------------------------------------------------------|-----------------------------------------------------------------------------------------------------------------------------------------------------------------------------------------------------------|----------------|
| <i>Anledning till stillasittande</i><br><i>Många faktorer kan orsaka att folk sitter still långa perioder under arbetsdagarna. Vilken/vilka anledningar, om några, på den här listan skulle passa in på dig? Du kan välja flera svarsalternativ</i> | <i>Reason for sedentary</i><br><i>Many factors can cause people to sit for long periods during working days. Which reasons, if any, on this list apply to you? You can choose multiple answer options</i> | Yes / No       |
| Har aldrig tänkt på det                                                                                                                                                                                                                             | Never thought about it                                                                                                                                                                                    |                |
| Jag ser inte att stillasittande i långa perioder är ett problem                                                                                                                                                                                     | I don't see prolonged sitting as a problem                                                                                                                                                                |                |
| Det är en vana att sitta                                                                                                                                                                                                                            | Sitting is a habit                                                                                                                                                                                        |                |
| Jag tränar tillräckligt                                                                                                                                                                                                                             | I exercise enough                                                                                                                                                                                         |                |
| Jag kan inte stå av hälsoskäl                                                                                                                                                                                                                       | I can't stand for health reasons                                                                                                                                                                          |                |
| Jag har inte motivation att stå                                                                                                                                                                                                                     | I do not have any motivation to stand                                                                                                                                                                     |                |
| Stående är obekvämt                                                                                                                                                                                                                                 | Standing is uncomfortable                                                                                                                                                                                 |                |
| Stående är tröttande                                                                                                                                                                                                                                | Standing is tiring                                                                                                                                                                                        |                |
| Stående minskar arbetsprestationen                                                                                                                                                                                                                  | Standing reduces work performance                                                                                                                                                                         |                |
| Stående stör andra                                                                                                                                                                                                                                  | Standing disturbs others                                                                                                                                                                                  |                |
| Stående uppfattas som aggressivt                                                                                                                                                                                                                    | Standing is perceived as aggressive                                                                                                                                                                       |                |
| Jag känner mig blyg eller generad när jag står                                                                                                                                                                                                      | Standing makes me shy or embarrassed                                                                                                                                                                      |                |
| Stående passar sig inte i arbetsplatskulturen                                                                                                                                                                                                       | Does not fit in work culture                                                                                                                                                                              | Yes / No       |
| <i>Vilket stöd skulle du vilja få från din arbetsgivare för att förändra hur mycket du sitter still.</i><br><i>Du kan välja flera svarsalternativ</i>                                                                                               | <i>What support would you like from your employer to change how much you are sitting?</i><br><i>You can choose multiple answer options</i>                                                                |                |
| Utformning av arbetsplatsen som helhet (ex trappor, lunchrum, placering av skrivare)                                                                                                                                                                | Redesign of work environment (e.g. stairs, lunch room, placement of printer)                                                                                                                              |                |
| Utformning av din egen arbetsplats (ex höj- och sänkbart skrivbord, mobiltelefon och datorlösning)                                                                                                                                                  | Redesign of own workplace (e.g. standing desks, mobile phone and computer)                                                                                                                                |                |
| Förändring av attityder/normer på arbetsplatsen                                                                                                                                                                                                     | Change attitudes/norms in the workplace                                                                                                                                                                   |                |
| Stående arbetsmöten                                                                                                                                                                                                                                 | Standing meetings                                                                                                                                                                                         |                |
| Gående arbetsmöten                                                                                                                                                                                                                                  | Walking meetings                                                                                                                                                                                          |                |
| Möjlighet eller påminnelser till pauser el motsvarande                                                                                                                                                                                              | Possibility or reminders for breaks                                                                                                                                                                       |                |
| Fler personliga möten (istället för e-post, chatt etc.)                                                                                                                                                                                             | More personal meetings (instead of email, chat etc)                                                                                                                                                       |                |
| App i mobiltelefon eller aktivitetsarmband                                                                                                                                                                                                          | App or activity watch                                                                                                                                                                                     |                |
| Individuellt stöd av extern coach                                                                                                                                                                                                                   | Individual support from external coach                                                                                                                                                                    |                |
| Möjlighet till stöd i grupp på arbetstid                                                                                                                                                                                                            | Possibility of group support during work hours                                                                                                                                                            |                |
| Jag ser inte att min arbetsgivare kan stödja förändring gällande                                                                                                                                                                                    | I don't see any possibilities                                                                                                                                                                             |                |
